# Supplementary material
Source: publisher figshare collection journal article supplement (https://tandf.figshare.com/ndownloader/files/12280082)
Supplement: Supplementary file 1 [file 12280082]

**Supplemental Table 1 : Selected studies that identified potential PTM biomarkers.**

| Year | Disease                                          | Sample                           | Methodology                                                                 | Findings                                                                                                                                                                                           | Reference |
|------|--------------------------------------------------|----------------------------------|-----------------------------------------------------------------------------|----------------------------------------------------------------------------------------------------------------------------------------------------------------------------------------------------|-----------|
| 1999 | Thrombosis and Hemostasis                        | Human platelets                  | Flow cytometry                                                              | The phosphorylation levels of VASP-P may be used as marker of P2Y12 receptor inhibition during antiplatelet treatment.                                                                             | 1         |
| 2005 | Type 2 diabetes, microangiopathy                 | Red blood cells                  | LC-ESI-MS                                                                   | Increased levels of glutathionylated hemoglobin in diabetic subjects with microangiopathy                                                                                                          | 2         |
| 2006 | Pancreatic cancer                                | Serum                            | Lectin affinity enrichment                                                  | Downregulation of Sialylated plasma protease C1 inhibitor and downregulation N83 glycosylation of $\alpha$ 1-antitrypsin in cancer serum.                                                          | 3         |
| 2010 | Diabetes                                         | Whole blood                      | High performance liquid chromatography                                      | Glycated hemoglobin may be used as a marker for diagnostic tests in diabetes.                                                                                                                      | 4         |
| 2011 | Breast cancer                                    | Serum                            | MALDI-FTICR-MS of native glycans                                            | Increased levels of high-mannose-type structures                                                                                                                                                   | 5         |
| 2012 | Ovarian cancer                                   | Serum                            | MALDI-TOF-MS of permethylated glycans                                       | Increased levels of tri- and tetra-branched sialylated and fucosylated N-glycans, decreased levels of glycans containing a bisecting GlcNAc                                                        | 6         |
| 2014 | Liver disease, kidney disease, diabetes mellitus | Plasma                           | ESI-TOF-MS of purified HSA                                                  | Increased Cys-34-cysteinylation of HSA                                                                                                                                                             | 7         |
| 2015 | Colorectal Cancer                                | Colon tissues                    | Carbon-LC-ESI-MS/MS of membrane protein glycans                             | Increased levels of high mannose, hybrid and paucimannosidic type N-glycans, decreased levels of complex N-glycans                                                                                 | 8         |
| 2015 | Alzheimer's disease                              | Postmortem frontal cortex tissue | Phosphopeptide enrichment by IMAC, LC-MS/MS                                 | 253 significantly altered phosphopeptides, 21% of which from tau                                                                                                                                   | 9         |
| 2016 | Alzheimer's disease                              | Cerebrospinal fluid              | Phosphopeptide enrichment by IMAC and TiO <sub>2</sub> , TMT quantification | 31 different phosphorylation sites on tau                                                                                                                                                          | 10        |
| 2017 | Gastric cancer                                   | Serum                            | MALDI-TOF-MS of ethyl esterified glycans                                    | Increased levels of hybrid N-glycans and multi-branched type (tri-, tetra-antennary glycans), decreased levels total bisecting type N-glycans, monoantennary N-glycans, galactose and total fucose | 11        |
| 2018 | Ovarian cancer                                   | Serum                            | MRM of glycopeptides                                                        | Increased glycosylation of alpha-1-antitrypsin, alpha-1-acid glycoprotein and haptoglobin, decreased glycosylation of alpha-2-macroglobulin and transferrin                                        | 12        |

- 1 Schwarz, U.R., et al., Flow cytometry analysis of intracellular VASP phosphorylation for the assessment of activating and inhibitory signal transduction pathways in human platelets--definition and detection of ticlopidine/clopidogrel effects.. *Thromb Haemost*, 1999. 82(3): 1145-52.
- 2 Sampathkumar, R., et al., *Increased glutathionylated hemoglobin (HbSSG) in type 2 diabetes subjects with microangiopathy*. *Clin Biochem*, 2005. 38(10): p. 892-9.
- 3 Zhao, J. et al., Comparative Serum Glycoproteomics Using Lectin Selected Sialic Acid Glycoproteins with Mass Spectrometric Analysis: Application to Pancreatic Cancer Serum. *J Proteome Res*, 2006. 5(7): 1792-1802.
- 4 Selvin, E., et al., Glycated Hemoglobin, Diabetes, and Cardiovascular Risk in Nondiabetic Adults. *N Engl J Med*, 2010. 362(9): 800-811.
- 5 de Leoz, M.L., et al., *High-mannose glycans are elevated during breast cancer progression*. *Mol Cell Proteomics*, 2011. 10(1): p. M110 002717.
- 6 Alley, W.R., Jr., et al., *N-linked glycan structures and their expressions change in the blood sera of ovarian cancer patients*. *J Proteome Res*, 2012. 11(4): p. 2282-300.
- 7 Nagumo, K., et al., *Cys34-cysteinylation of human serum albumin is a sensitive plasma marker in oxidative stress-related chronic diseases*. *PLoS One*, 2014. 9(1): p. e85216.
- 8 Sethi, M.K., et al., *In-depth N-glycome profiling of paired colorectal cancer and non-tumorigenic tissues reveals cancer-, stage- and EGFR-specific protein N-glycosylation*. *Glycobiology*, 2015. 25(10): p. 1064-78.
- 9 Dammer, E.B., et al., *Quantitative phosphoproteomics of Alzheimer's disease reveals cross-talk between kinases and small heat shock proteins*. *Proteomics*, 2015. 15(2-3): p. 508-519.
- 10 Russell, C.L., et al., *Comprehensive Quantitative Profiling of Tau and Phosphorylated Tau Peptides in Cerebrospinal Fluid by Mass Spectrometry Provides New Biomarker Candidates*. *J Alzheimers Dis*, 2017. 55(1): p. 303-313.
- 11 Qin, R., et al., *Discovery of Non-invasive Glycan Biomarkers for Detection and Surveillance of Gastric Cancer*. *J Cancer*, 2017. 8(10): p. 1908-1916.
- 12 Miyamoto, S., et al., *Multiple Reaction Monitoring for the Quantitation of Serum Protein Glycosylation Profiles: Application to Ovarian Cancer*. *J Proteome Res*, 2018. 17(1): p. 222-233.
